# Supplementary material
Source: PubMed Central journal article supplement (PMC3288315)
Supplement: NIHMS339775-supplement-01.pdf [file NIHMS339775-supplement-01.pdf]

Supplemental Digital Content 1. Medical history and selected presenting characteristics of children hospitalized for ARI/fever (excluding IV, RSV, HPIV and HMPV coinfections) and asymptomatic controls by HCoV status, during the 12 months when controls were enrolled.

|                                            | <u>Any HCoV Positive</u> |                        | <u>HKU1 Positive</u> |                        | <u>NL63 Positive</u> |                        | <u>229E Positive</u> |                       | <u>OC43 Positive</u> |                        | <u>HCoV Negative</u>  |                         |
|--------------------------------------------|--------------------------|------------------------|----------------------|------------------------|----------------------|------------------------|----------------------|-----------------------|----------------------|------------------------|-----------------------|-------------------------|
|                                            | Case<br>(n=83)<br>%      | Control<br>(n=53)<br>% | Case<br>(n=9)<br>%   | Control<br>(n=12)<br>% | Case<br>(n=21)<br>%  | Control<br>(n=18)<br>% | Case<br>(n=13)<br>%  | Control<br>(n=3)<br>% | Case<br>(n=41)<br>%  | Control<br>(n=20)<br>% | Case<br>(n=1368)<br>% | Control<br>(n=689)<br>% |
| <b>Lives with a Smoker</b>                 | 47.0                     | 34.0                   | 33.3                 | 33.3                   | 47.6                 | 33.3                   | 30.8                 | 33.3                  | 53.7                 | 35.0                   | 42.1                  | 36.9                    |
| <b>Born Premature (&gt;1 month early)</b>  | 7.2                      | 9.4                    | 0.0                  | 16.7                   | 14.3                 | 11.1                   | 0.0                  | 0.0                   | 7.3                  | 5.0                    | 16.4                  | 8.8                     |
| <b>Has One or More High Risk Condition</b> | 28.9                     | *11.3                  | 33.3                 | 16.7                   | 33.3                 | *0.0                   | 38.5                 | 0.0                   | 22.0                 | 20.0                   | 30.9                  | 10.4                    |
| <b>Asthma/Wheezing</b>                     | 14.5                     | 7.5                    | 22.2                 | 8.3                    | 9.5                  | 0.0                    | 15.4                 | 0.0                   | 14.6                 | 15.0                   | 22.0                  | 6.8                     |
| <b>Lung Condition</b>                      | 7.2                      | 1.9                    | 0.0                  | 8.3                    | 14.3                 | 0.0                    | 15.4                 | 0.0                   | 2.4                  | 0.0                    | 5.4                   | 0.1                     |
| <b>Neurological Condition</b>              | 7.2                      | 1.9                    | 0.0                  | 0.0                    | 14.3                 | 0.0                    | 15.4                 | 0.0                   | 2.4                  | 5.0                    | 5.8                   | 1.3                     |
| <b>Other</b>                               | 4.8                      | 0.0                    | 11.1                 | 0.0                    | 8.3                  | 0.0                    | 0.0                  | 0.0                   | 2.4                  | 0.0                    | 2.9                   | 2.6                     |

\* p<.05, chi-square test comparing hospitalizations versus asymptomatic controls for any HCoV, species NL63, and species OC43.

Supplemental Digital Content 2. Number and percentage HCoV infections among those tested by RT-PCR each month, hospitalized cases and asymptomatic controls

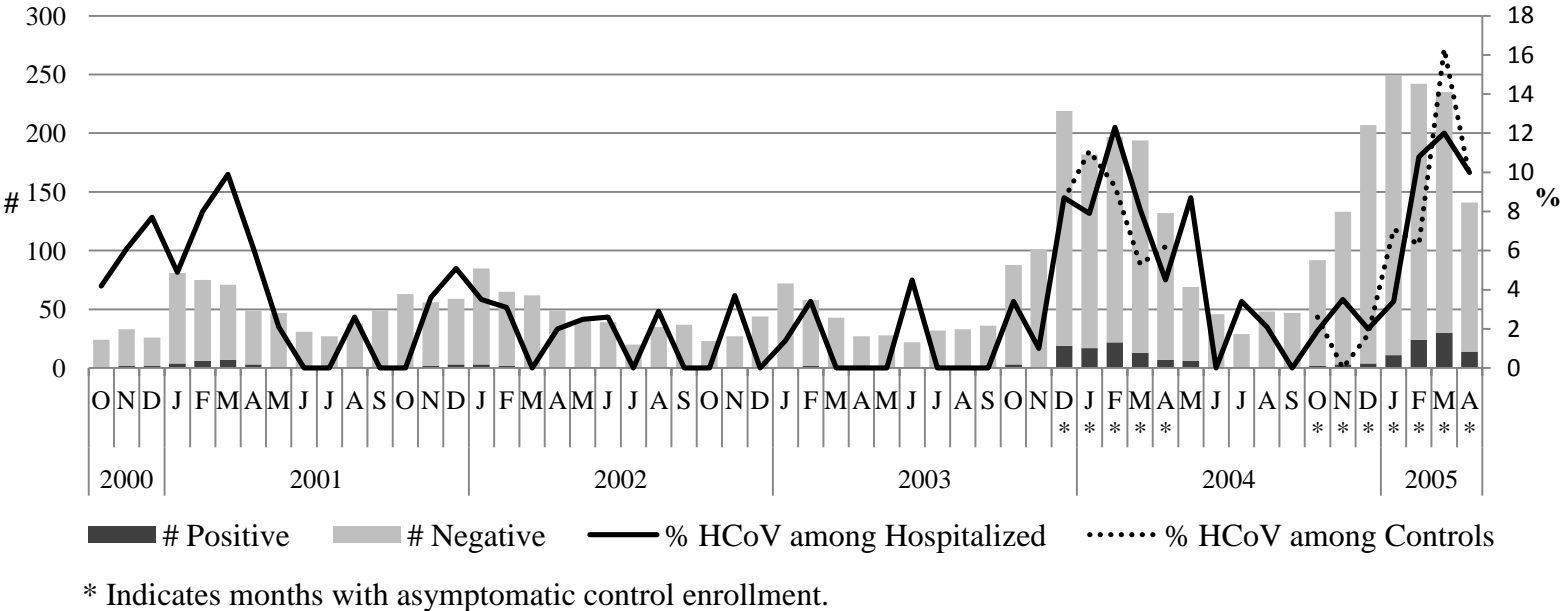

Supplemental Digital Content 3. Percentage of HCoV infections by species among those tested by RT-PCR each month, hospitalized cases and asymptomatic controls

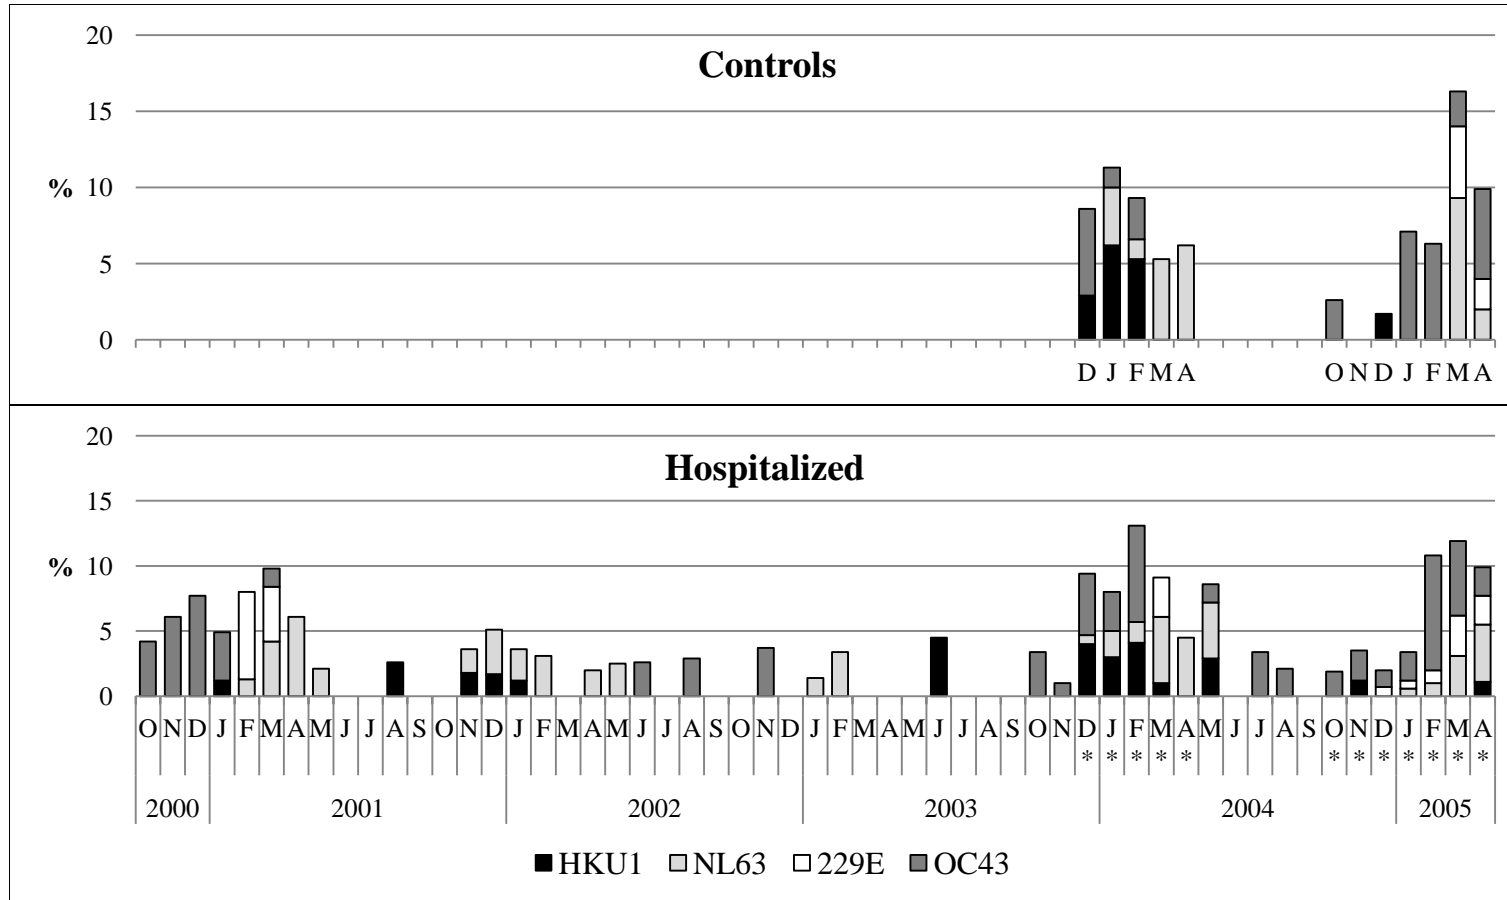

\* Indicates months with asymptomatic control enrollment.
